# Supplementary material
Source: MDPI journal article supplement (https://www.mdpi.com/2076-3417/12/9/4196)
Supplement: s1 [file s1]

# A novel Tri-Layer Cellulose-Based Membrane for the Capture and Analysis of Mainstream Smoke of Tobacco

Xuyan Song<sup>1</sup>, Min Wei <sup>1,\*</sup>, Yunlu He <sup>1</sup>, Xi Pan <sup>1</sup>, Xinjiao Cui <sup>2</sup>, Xiaodi Du <sup>2,\*</sup> and Junsheng Li <sup>2,\*</sup>

<sup>1</sup> Technology Centre of Hubei China Tobacco Industry Co., LTD., Wuhan 430051, China, songxy@hbtobacco.cn (Xuyan Song); weimin@hbtobacco.cn (Min Wei); 11013210@hbtobacco.cn (Xi Pan); heyunlu@hbtobacco.cn (Yunlu He)

<sup>2</sup> School of Chemistry, Chemical Engineering and Life Sciences, Wuhan University of Technology, Wuhan 430070, China, 304805@whut.edu.cn (Xinjiao Cui); duxiaodi@msn.com (Xiaodi Du); li\_j@whut.edu.cn (Junsheng Li)

\* Correspondence: weimin@hbtobacco.cn (M. W.), duxiaodi@msn.com (X. D.), li\_j@whut.edu.cn (J. L.).

**Table S1.** The weight of detected glycerin and triglyceride triacetate on CF/CAF/CF pad with different interlayer weight and CPF.

| Samples                                          | Glycerin detected (mg) |      |      |       |       |       |       |       | Triglyceride triacetate detected (mg) |      |      |       |       |       |       |       |
|--------------------------------------------------|------------------------|------|------|-------|-------|-------|-------|-------|---------------------------------------|------|------|-------|-------|-------|-------|-------|
|                                                  | 32 s                   | 64 s | 96 s | 128 s | 160 s | 192 s | 224 s | 256 s | 32 s                                  | 64 s | 96 s | 128 s | 160 s | 192 s | 224 s | 256 s |
| CF/CAF <sub>0.5</sub> /CF<br>(500 mg interlayer) | 0.02                   | 0.02 | 0.03 | 0.04  | 0.06  | 0.12  | 0.13  | 0.20  | 0.04                                  | 0.55 | 0.32 | 0.48  | 0.62  | 0.59  | 1.62  | 0.62  |
| CF/CAF <sub>0.4</sub> /CF<br>(400 mg interlayer) | 0.05                   | 0.09 | 0.17 | 0.34  | 0.62  | 0.53  | 0.33  | 0.22  | 0.87                                  | 0.64 | 0.90 | 0.53  | 1.02  | 0.85  | 0.77  | 0.97  |
| CF/CAF <sub>0.3</sub> /CF<br>(300 mg interlayer) | 0.10                   | 0.09 | 0.20 | 0.44  | 0.71  | 0.69  | 0.42  | 0.24  | 0.71                                  | 0.76 | 0.75 | 0.50  | 0.83  | 0.74  | 0.94  | 0.65  |
| CF/CAF <sub>0.2</sub> /CF<br>(200 mg interlayer) | 0.12                   | 0.11 | 0.18 | 0.48  | 0.78  | 0.72  | 0.45  | 0.24  | 0.47                                  | 0.61 | 0.61 | 0.64  | 0.68  | 0.55  | 0.66  | 0.56  |
| CF/CAF <sub>0.1</sub> /CF<br>(100 mg interlayer) | 0.06                   | 0.09 | 0.21 | 0.50  | 0.57  | 0.43  | 0.24  | 0.17  | 0.33                                  | 0.28 | 0.50 | 0.41  | 0.39  | 0.39  | 0.35  | 0.50  |
| CPF                                              | 0.11                   | 0.08 | 0.16 | 0.52  | 0.75  | 0.48  | 0.53  | 0.29  | 0.03                                  | 0.04 | 0.08 | 0.18  | 0.12  | 0.06  | 0.08  | 0.07  |
